# Supplementary material for: Biological sex affects the neurobiology of autism
Source: PubMed Central journal article supplement (PMC3754459; doi:10.1093/brain/awt216), 2013-08-09

A

all

split1

split2

GM

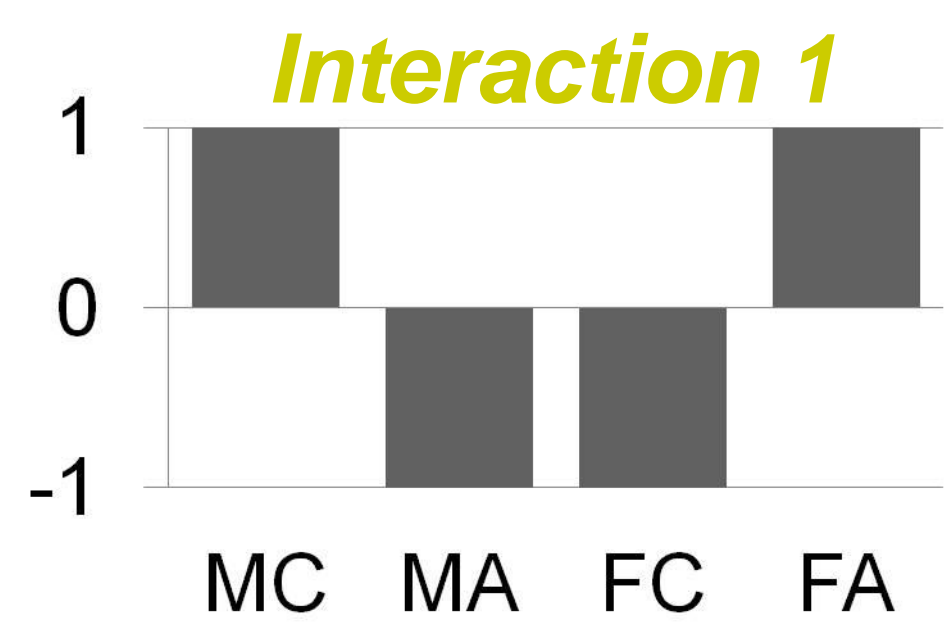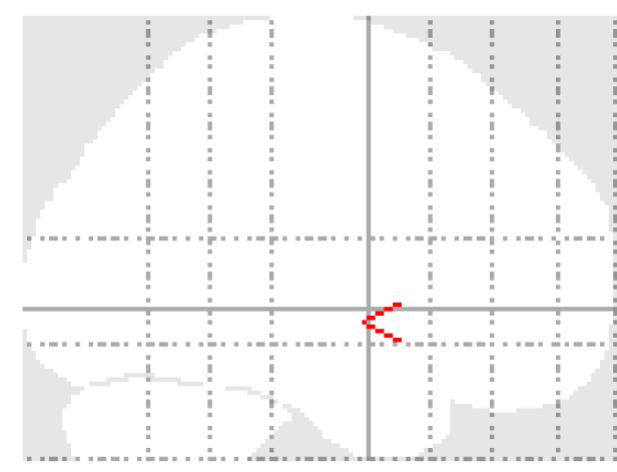

x = 25

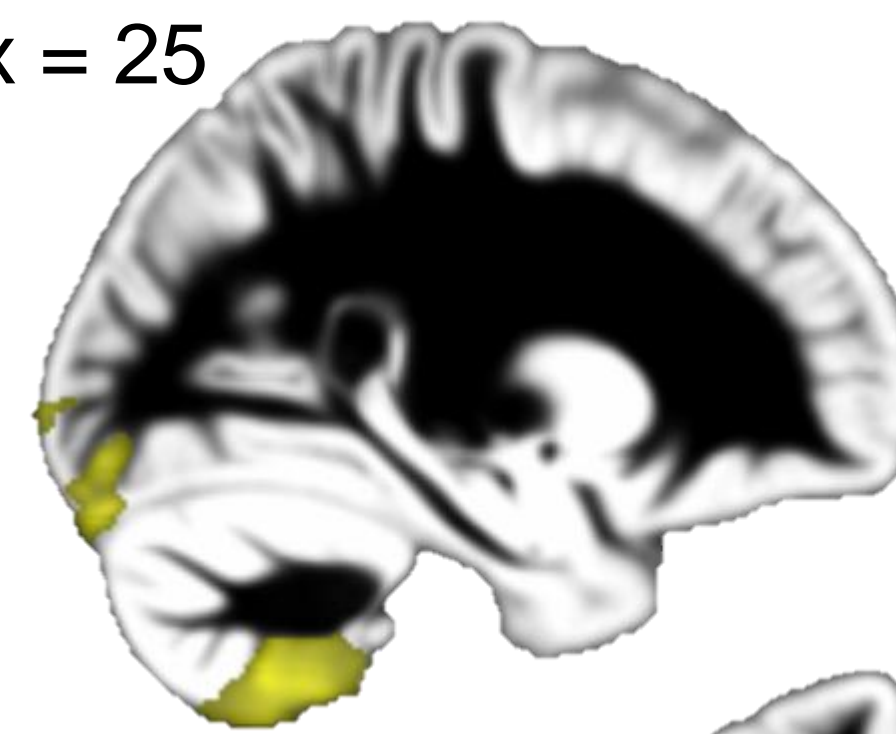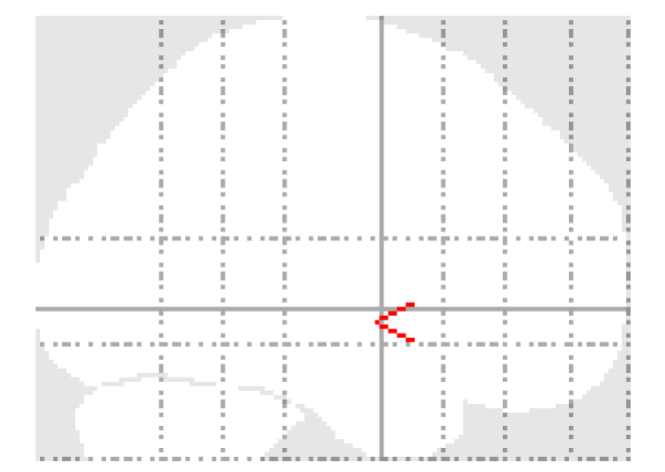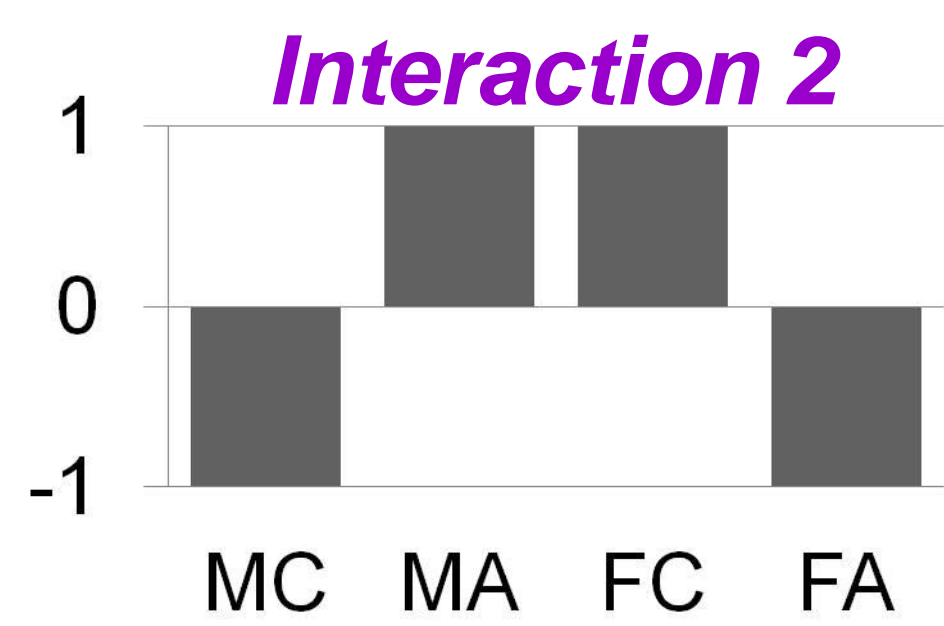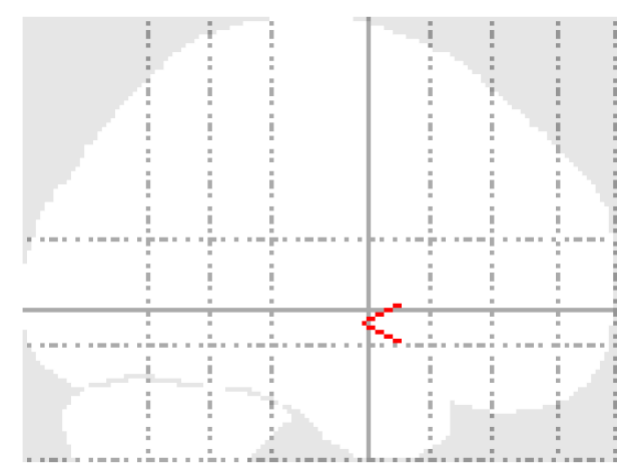

x = 3

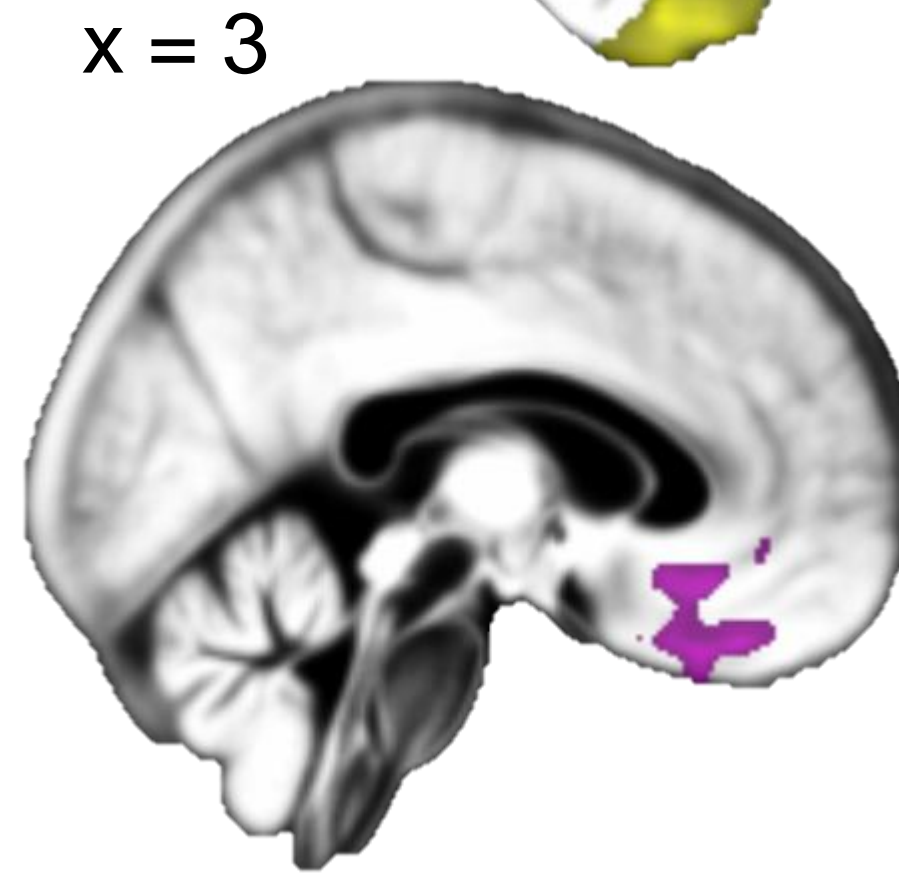

z = 12

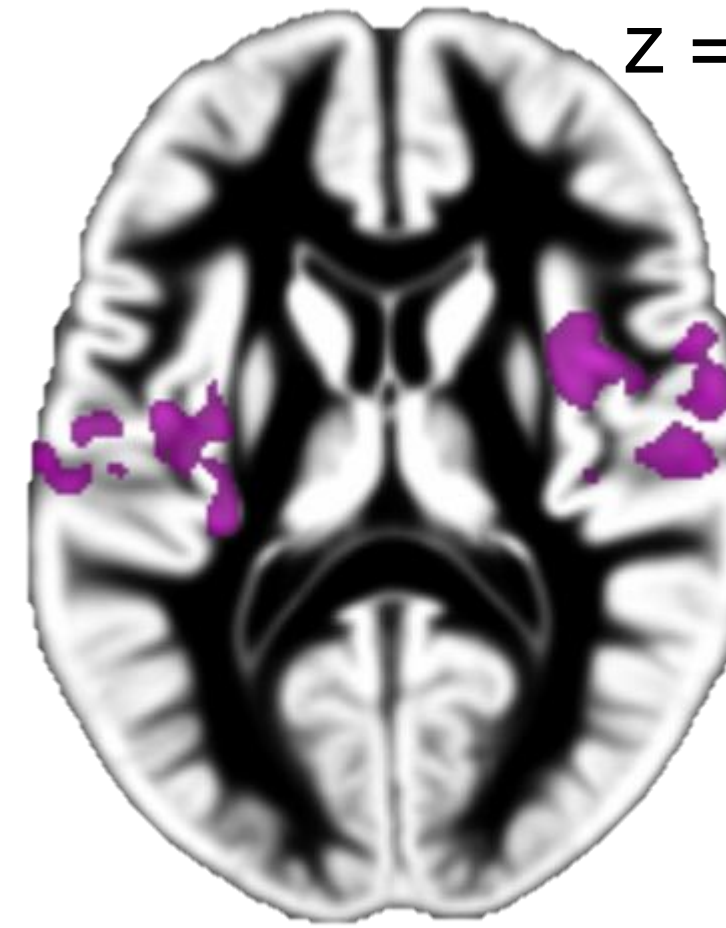

x = 30

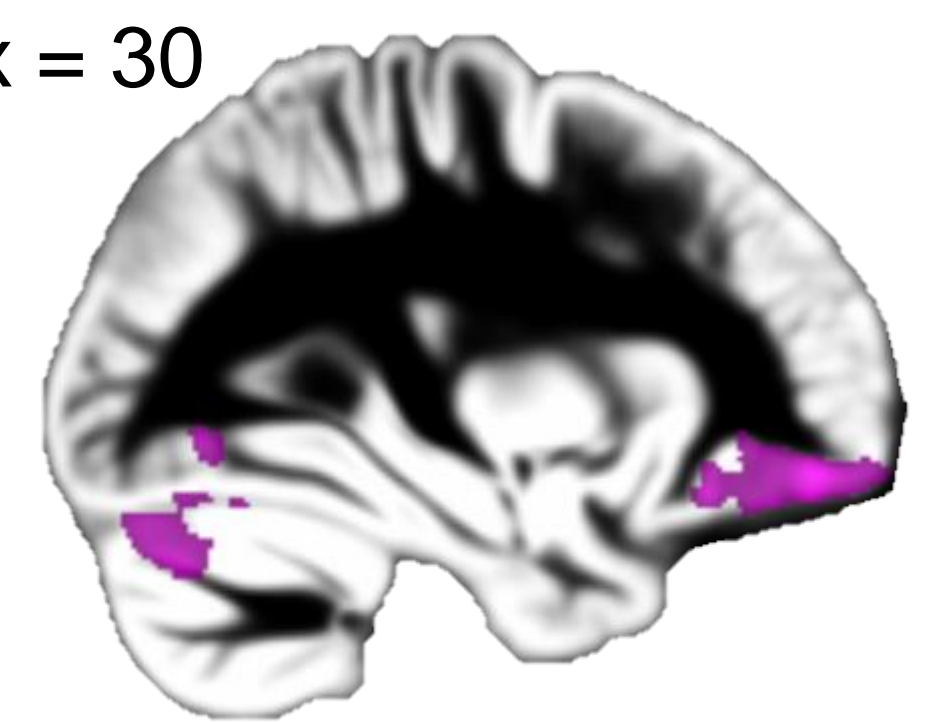

WM

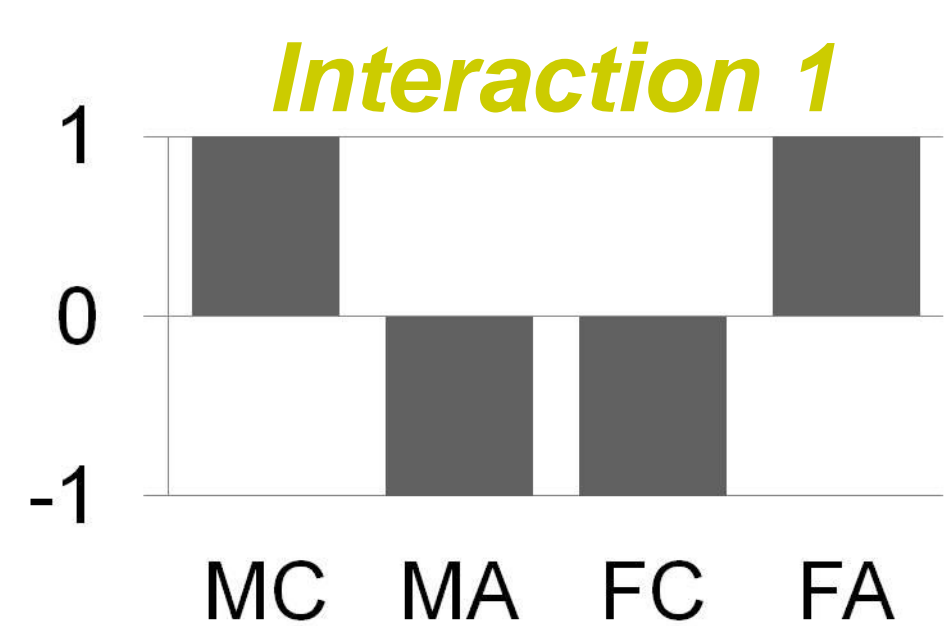

z = 30

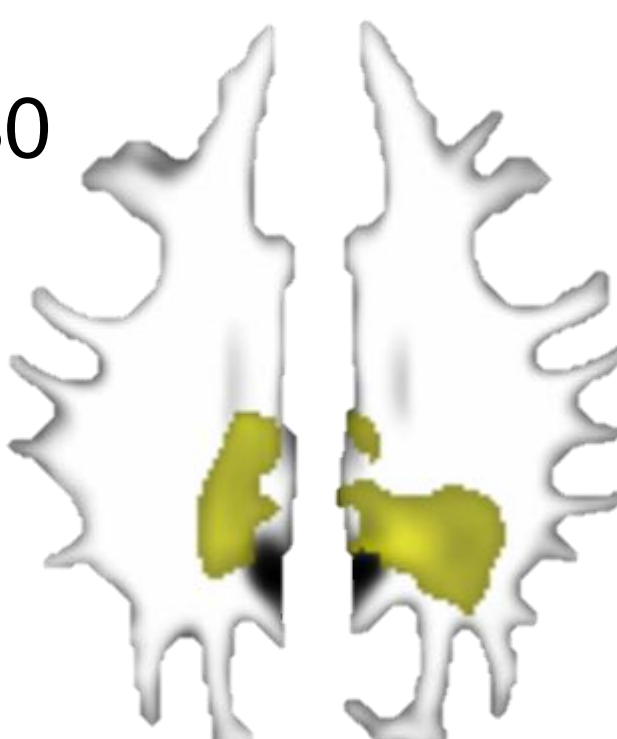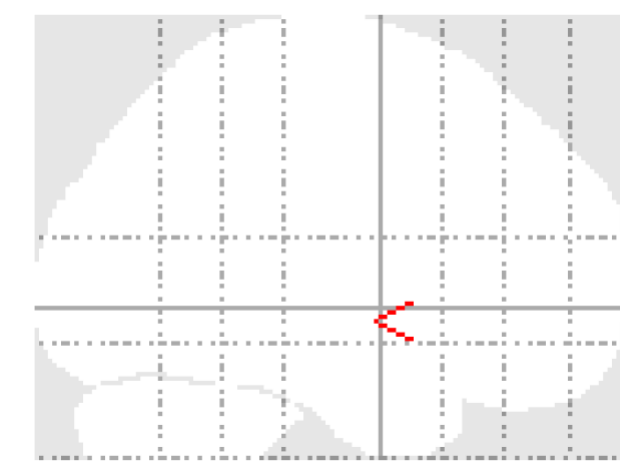

z = 30

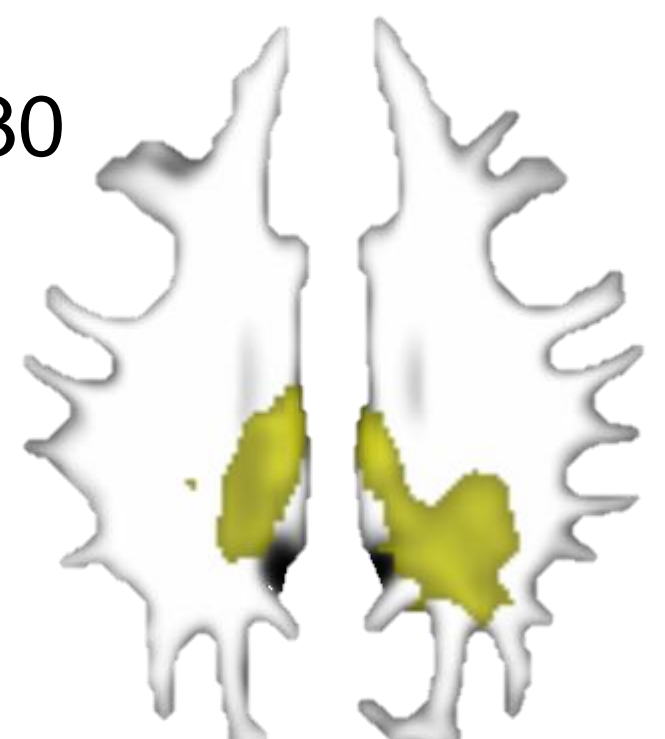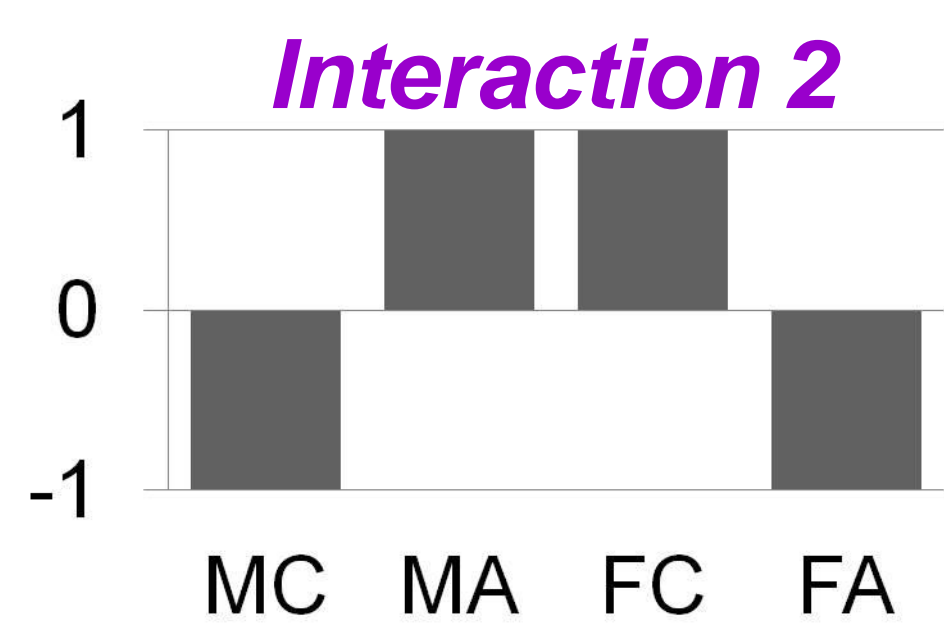

y = -19

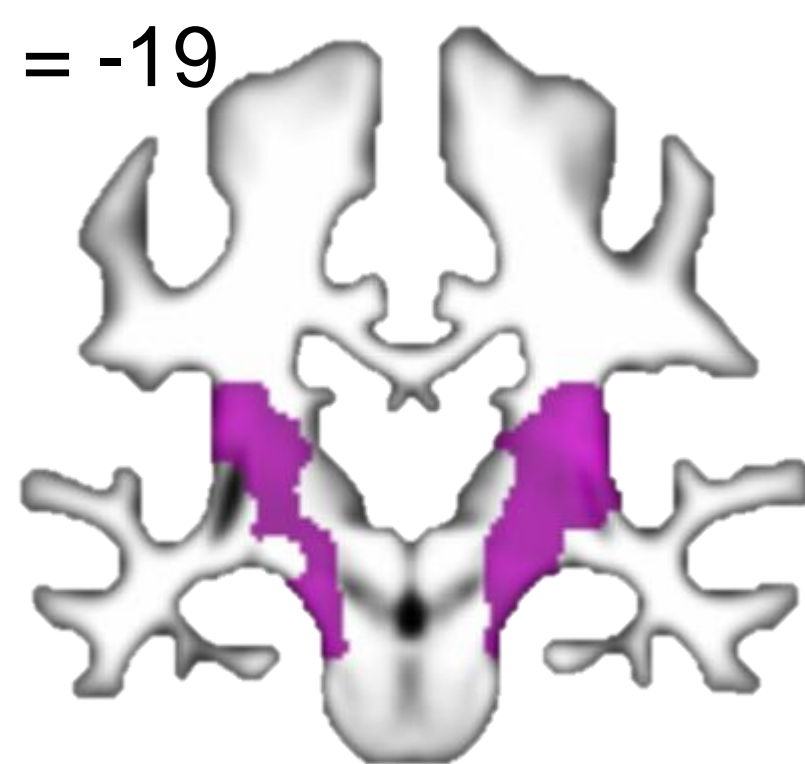

y = -19

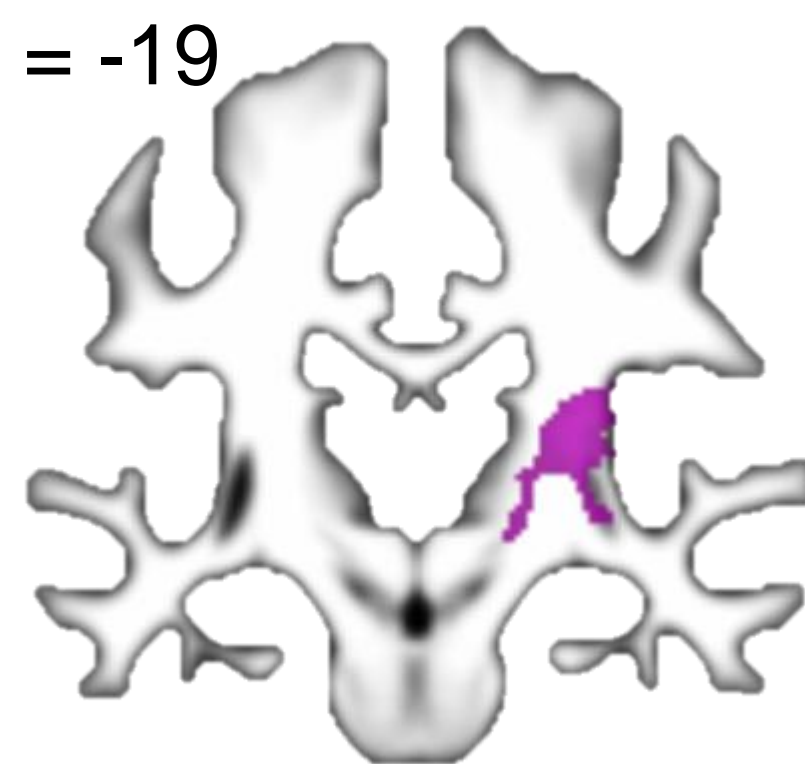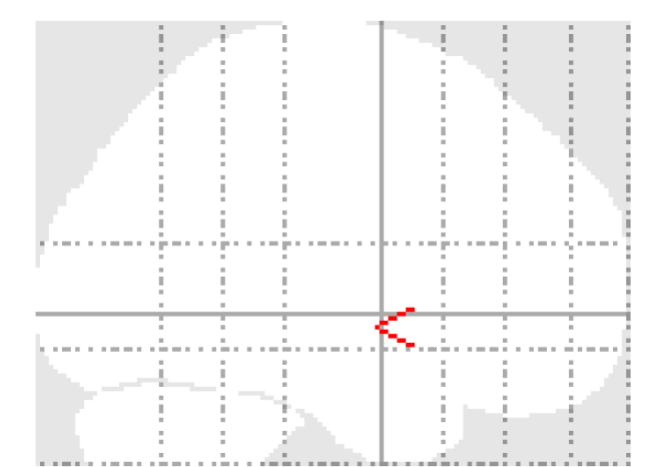

B

all

split1

split2

GM

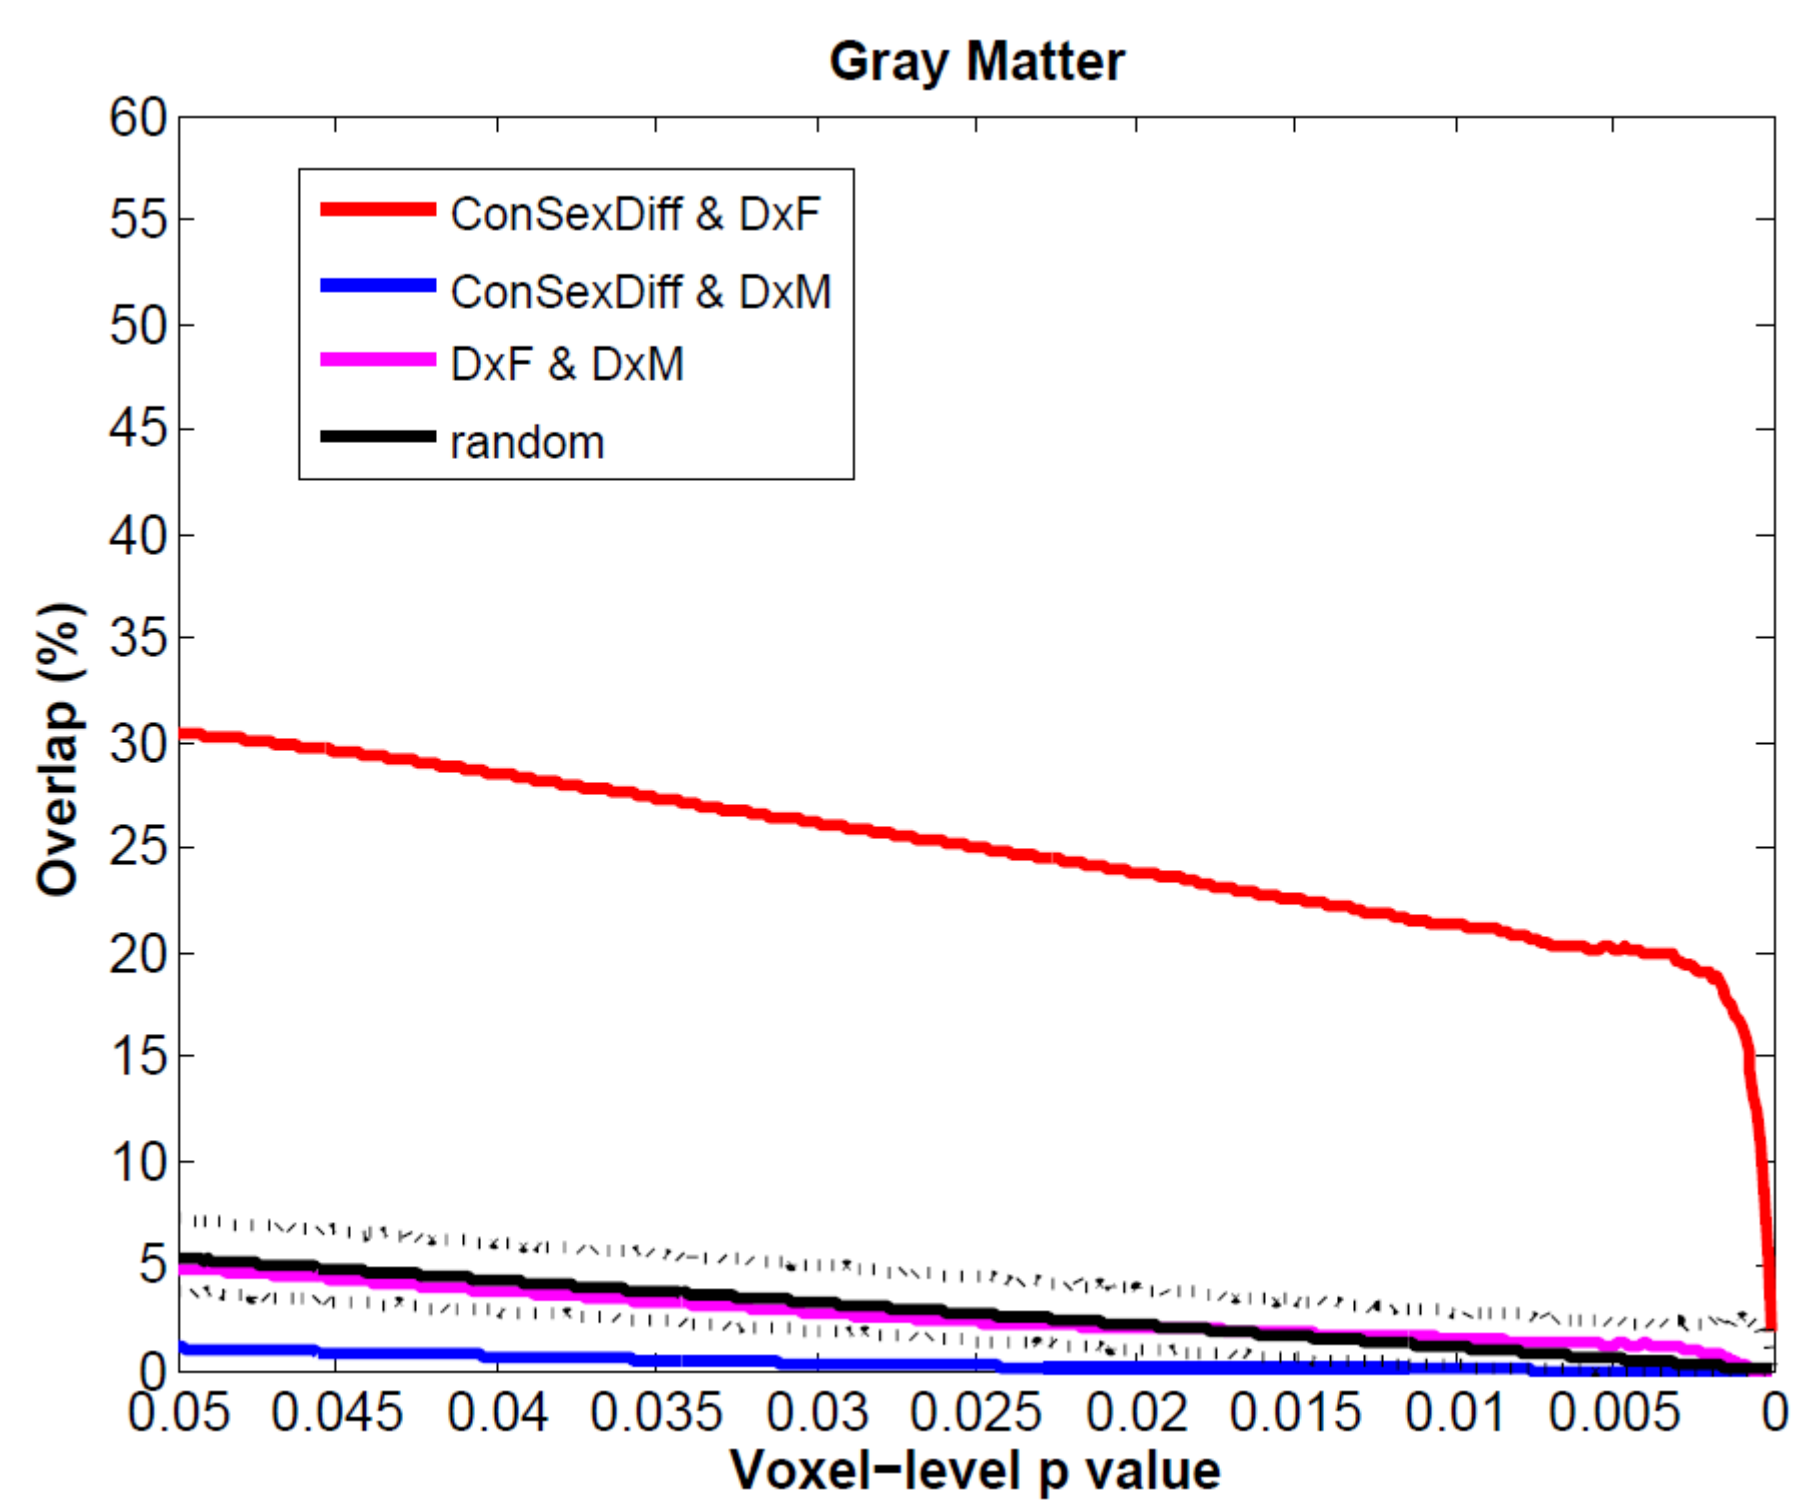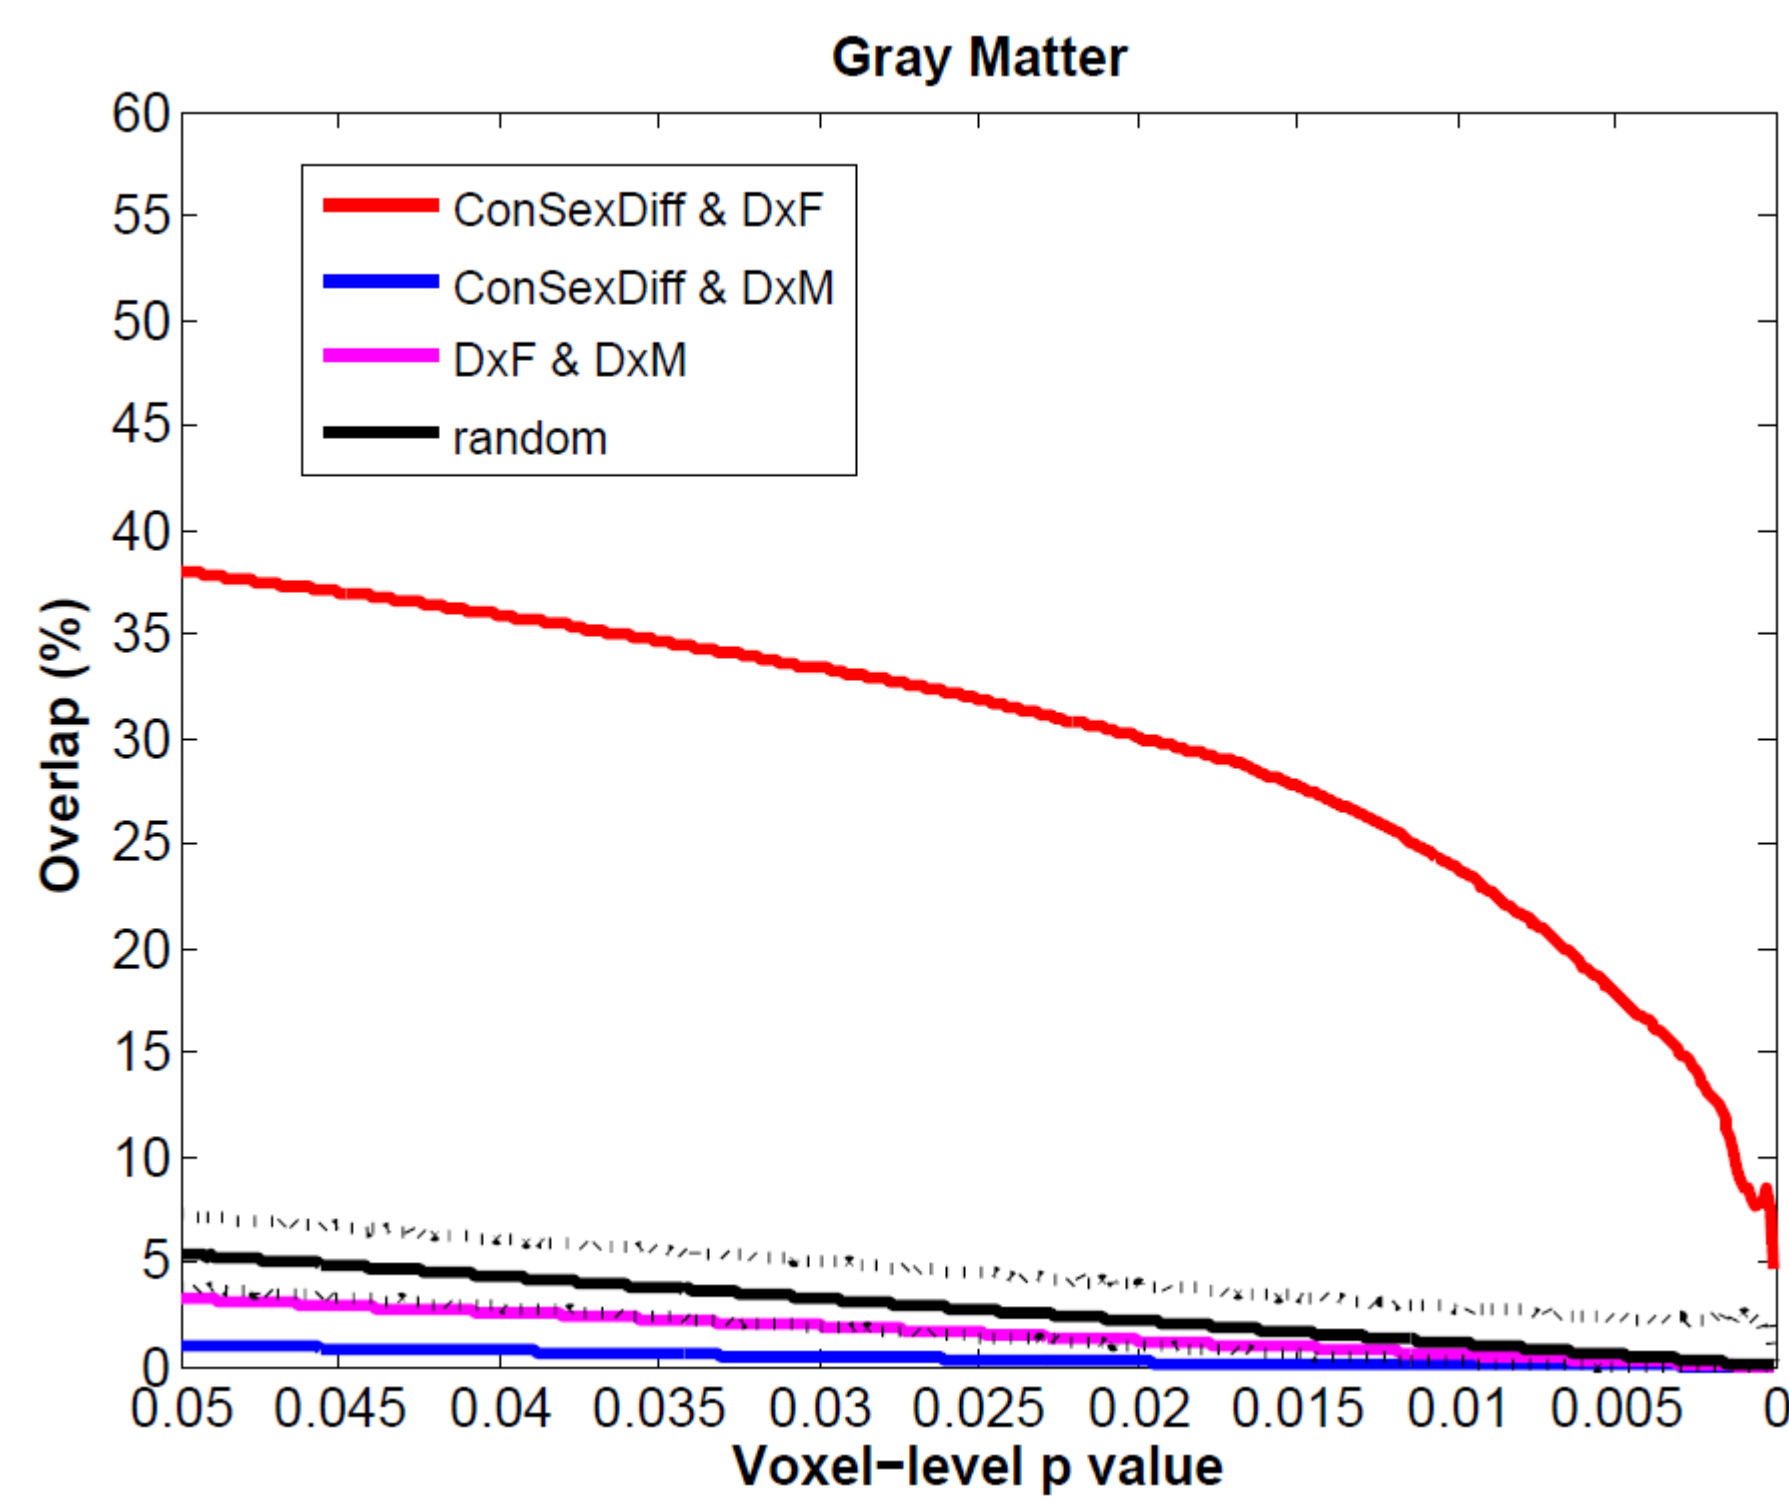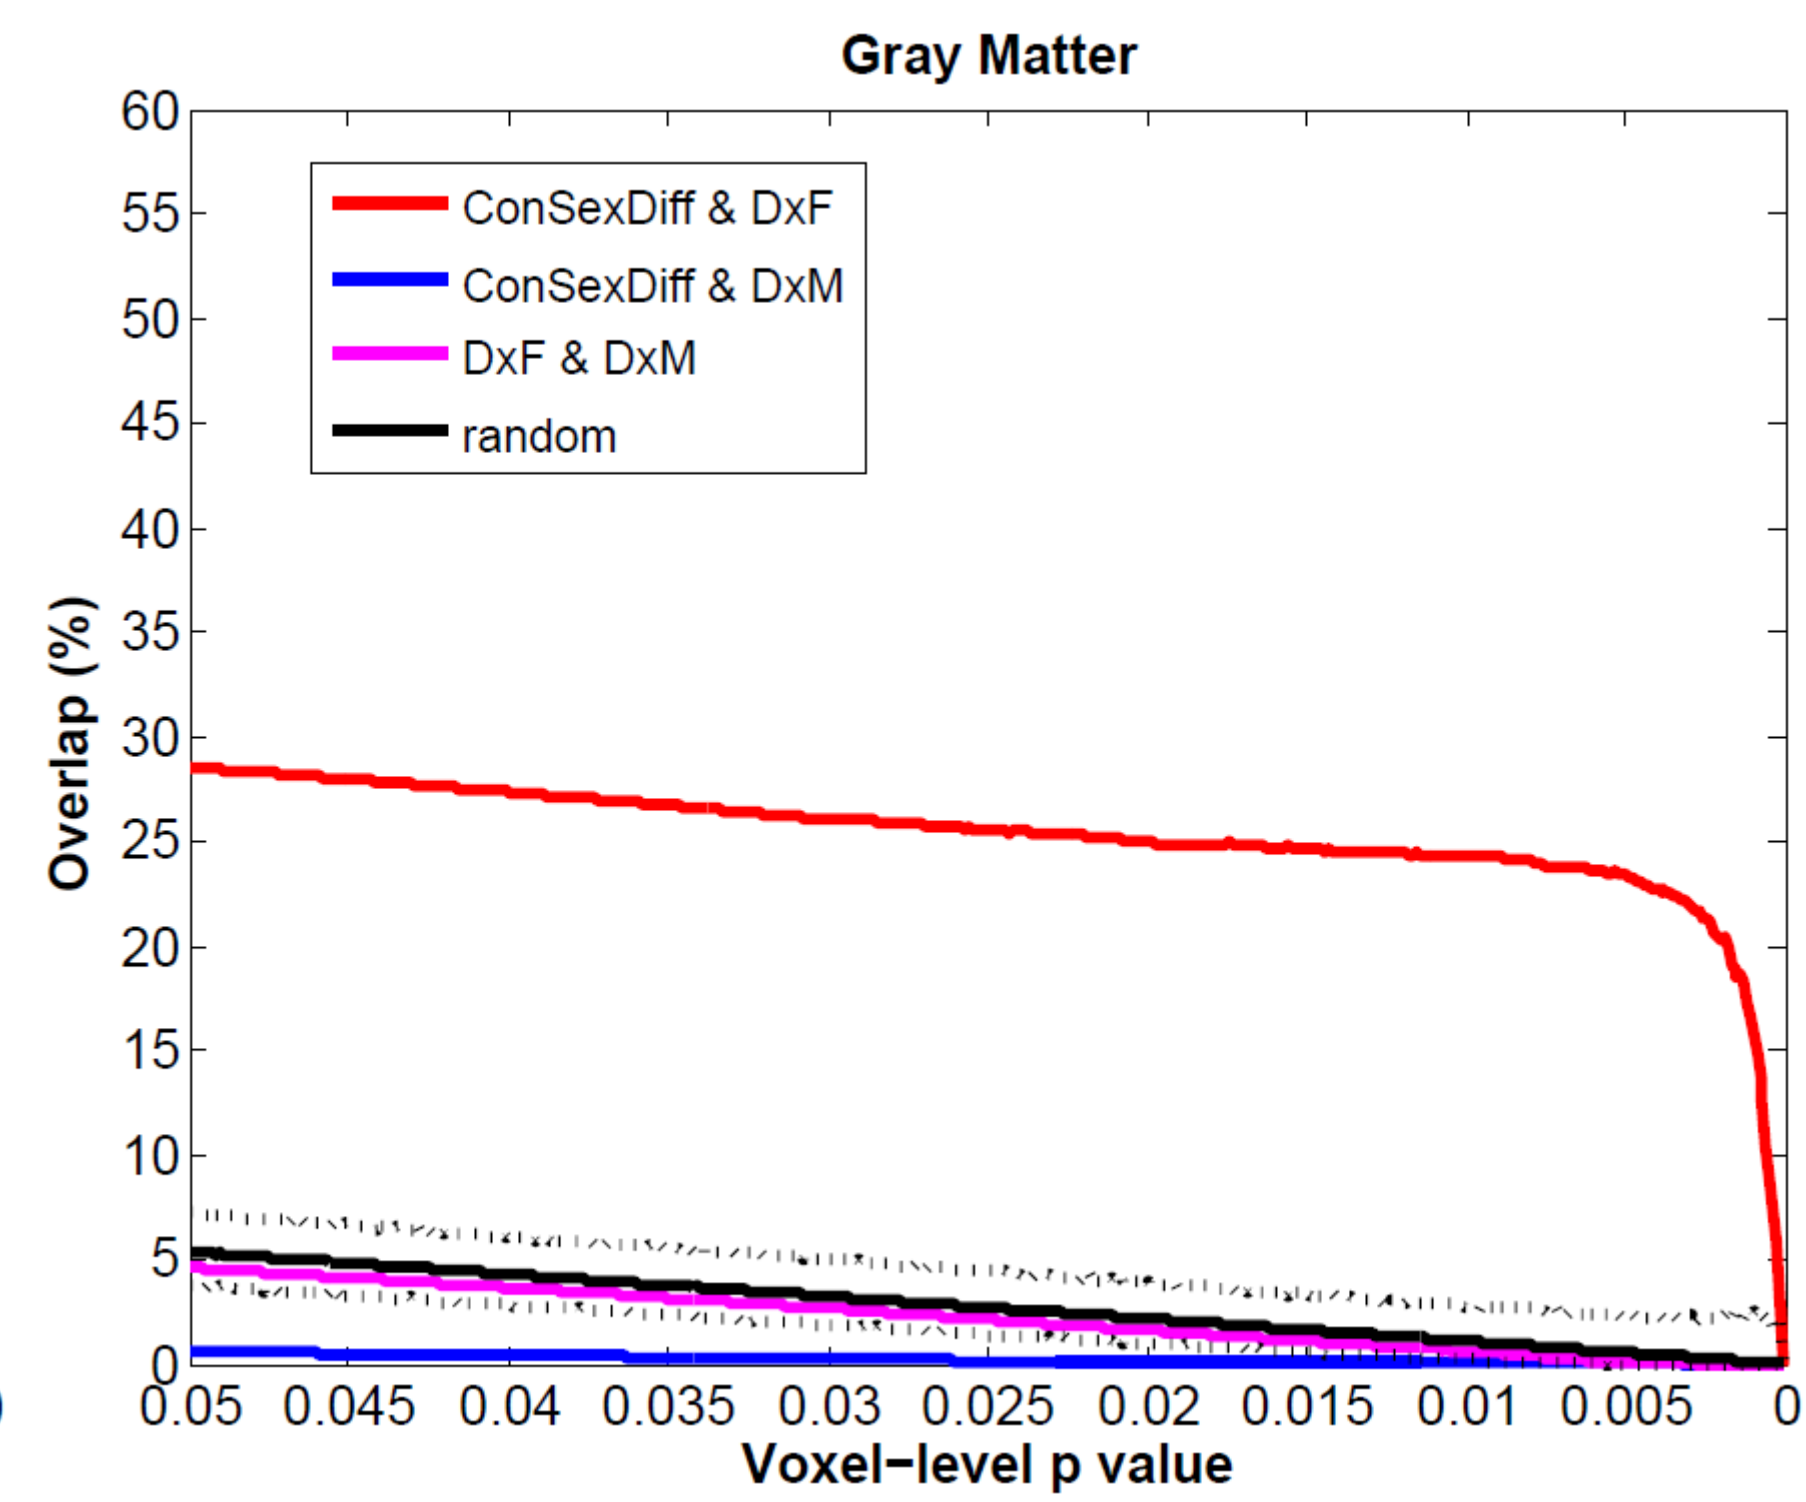

WM

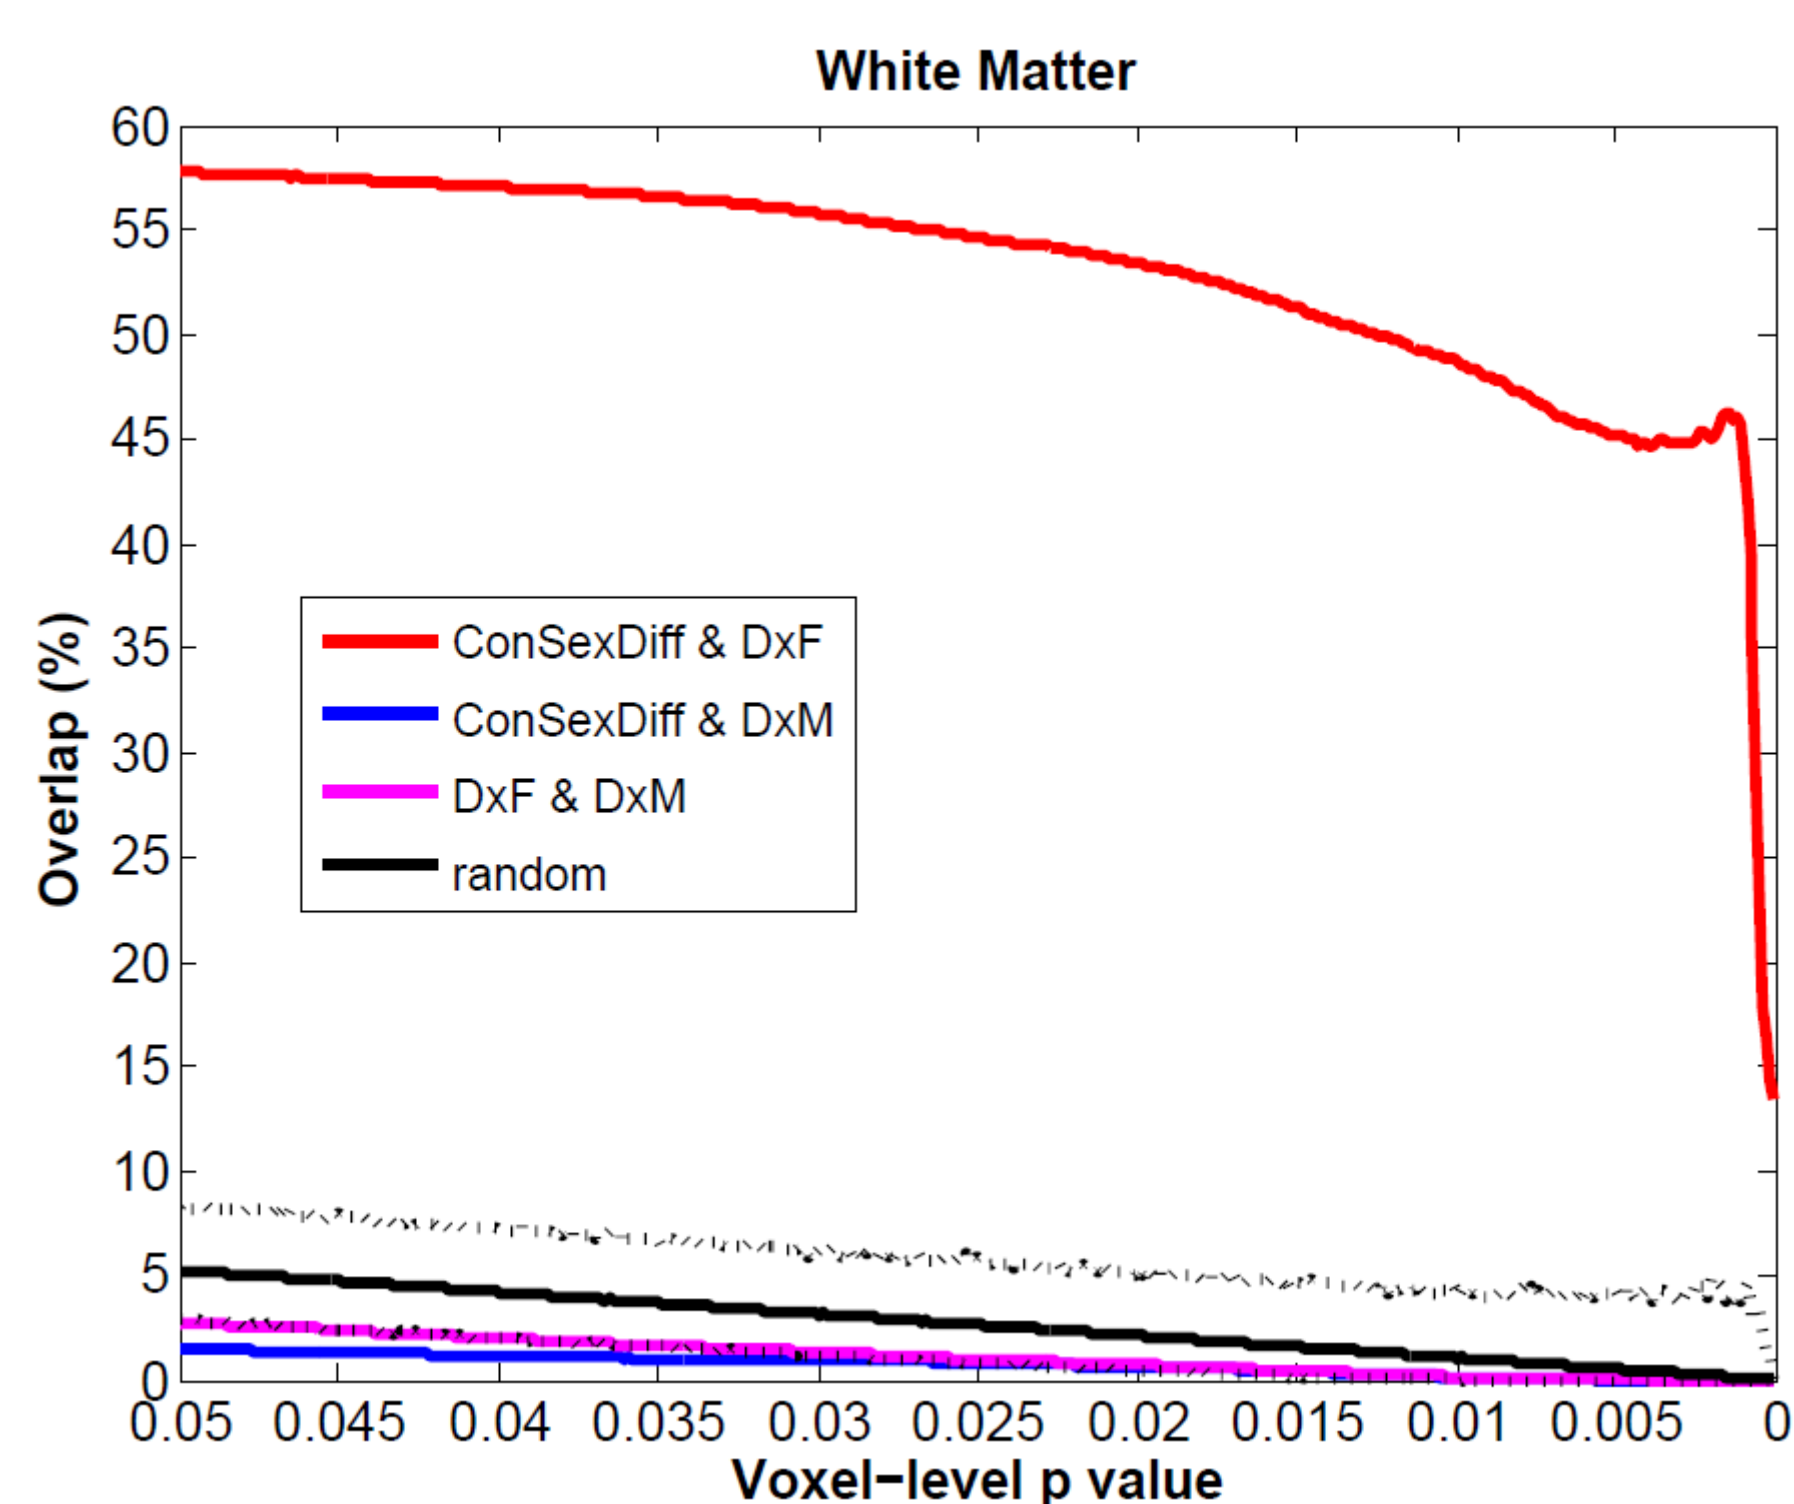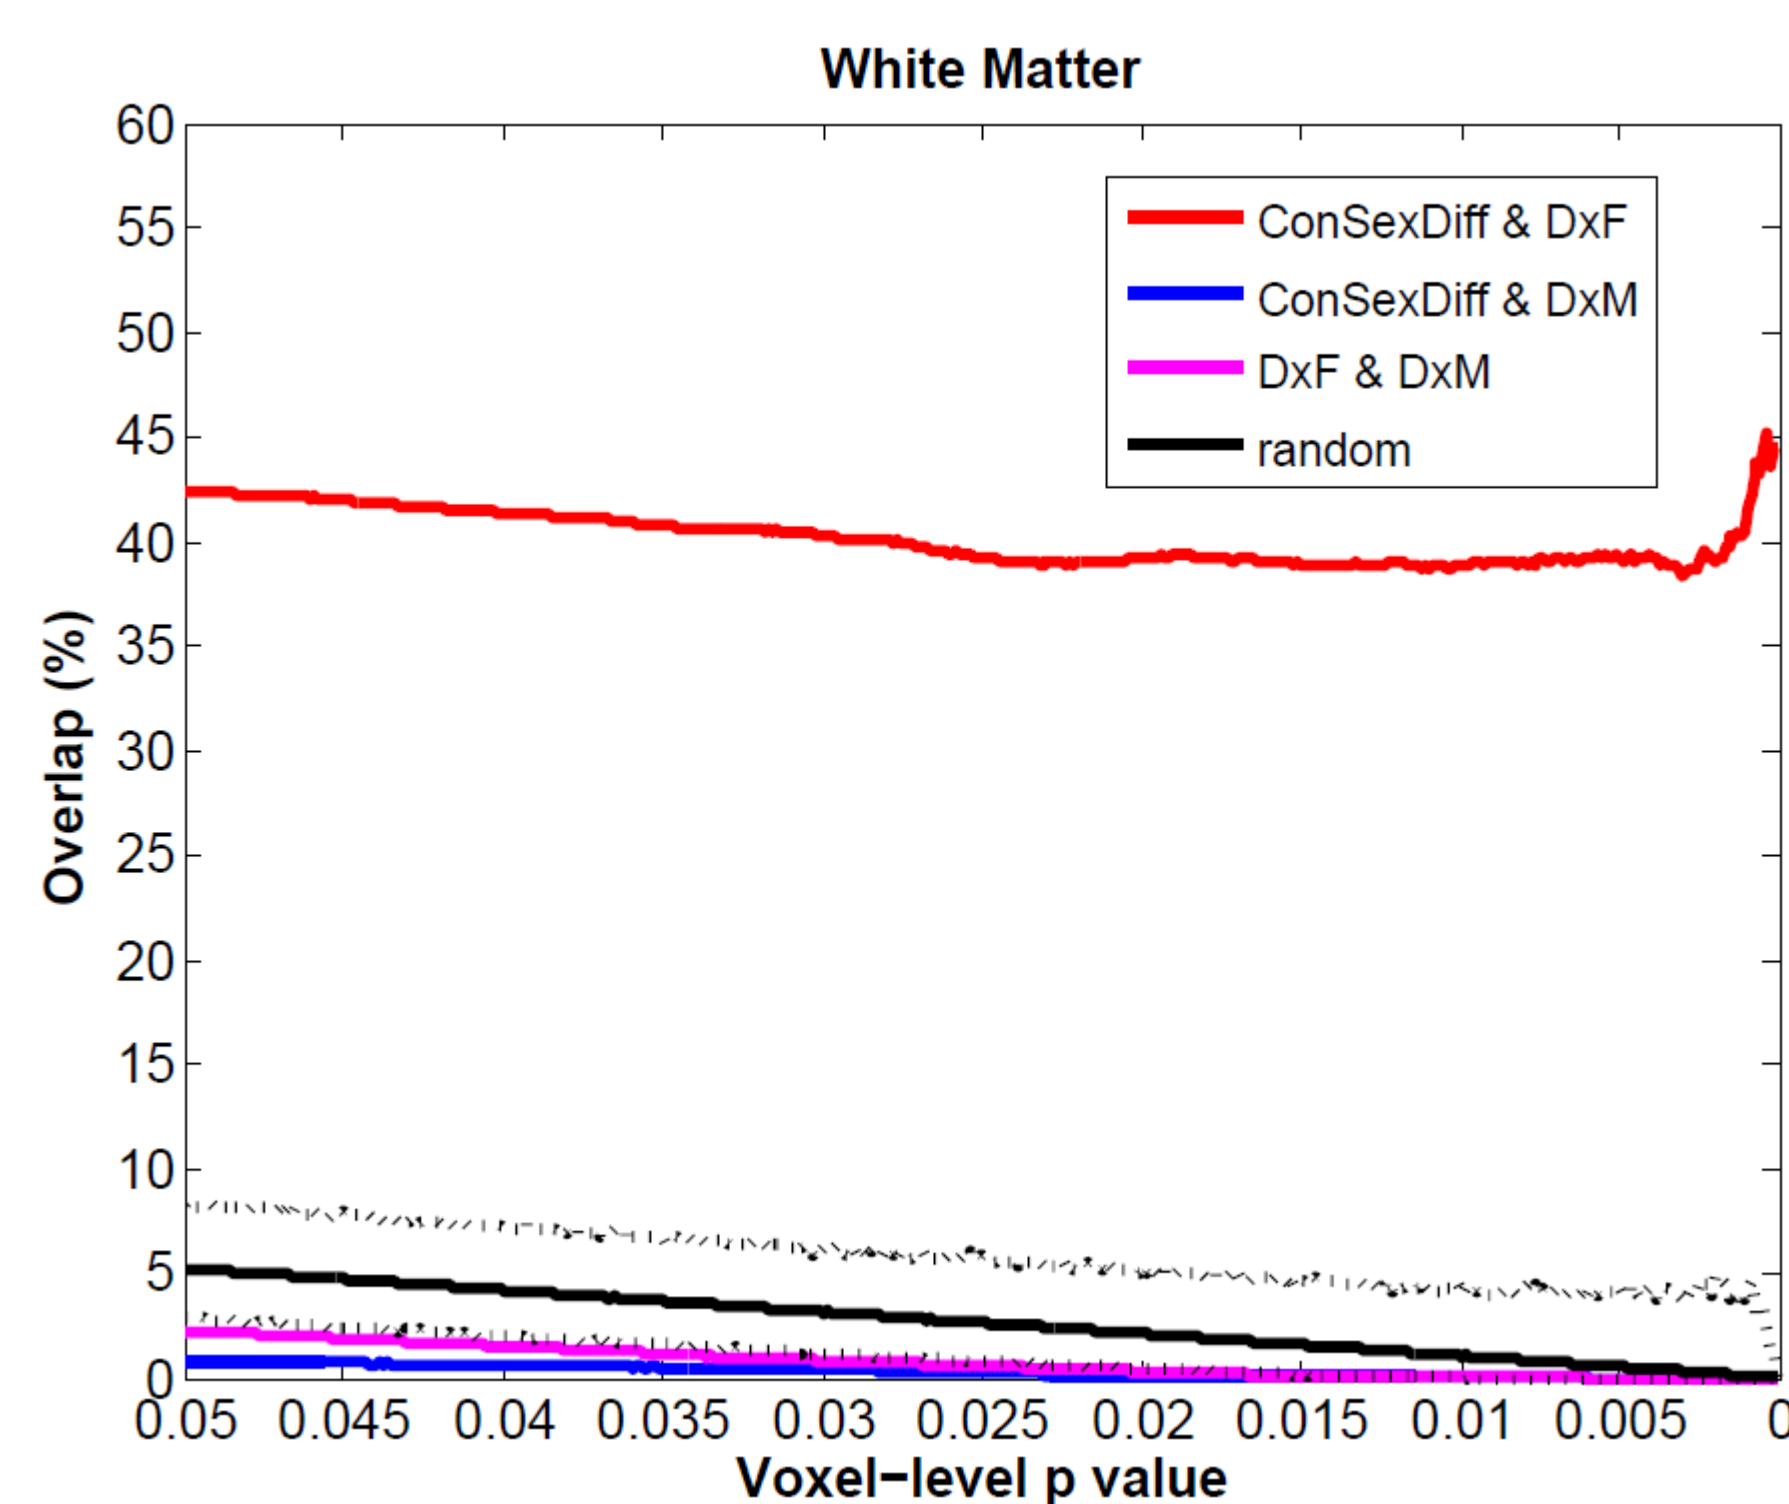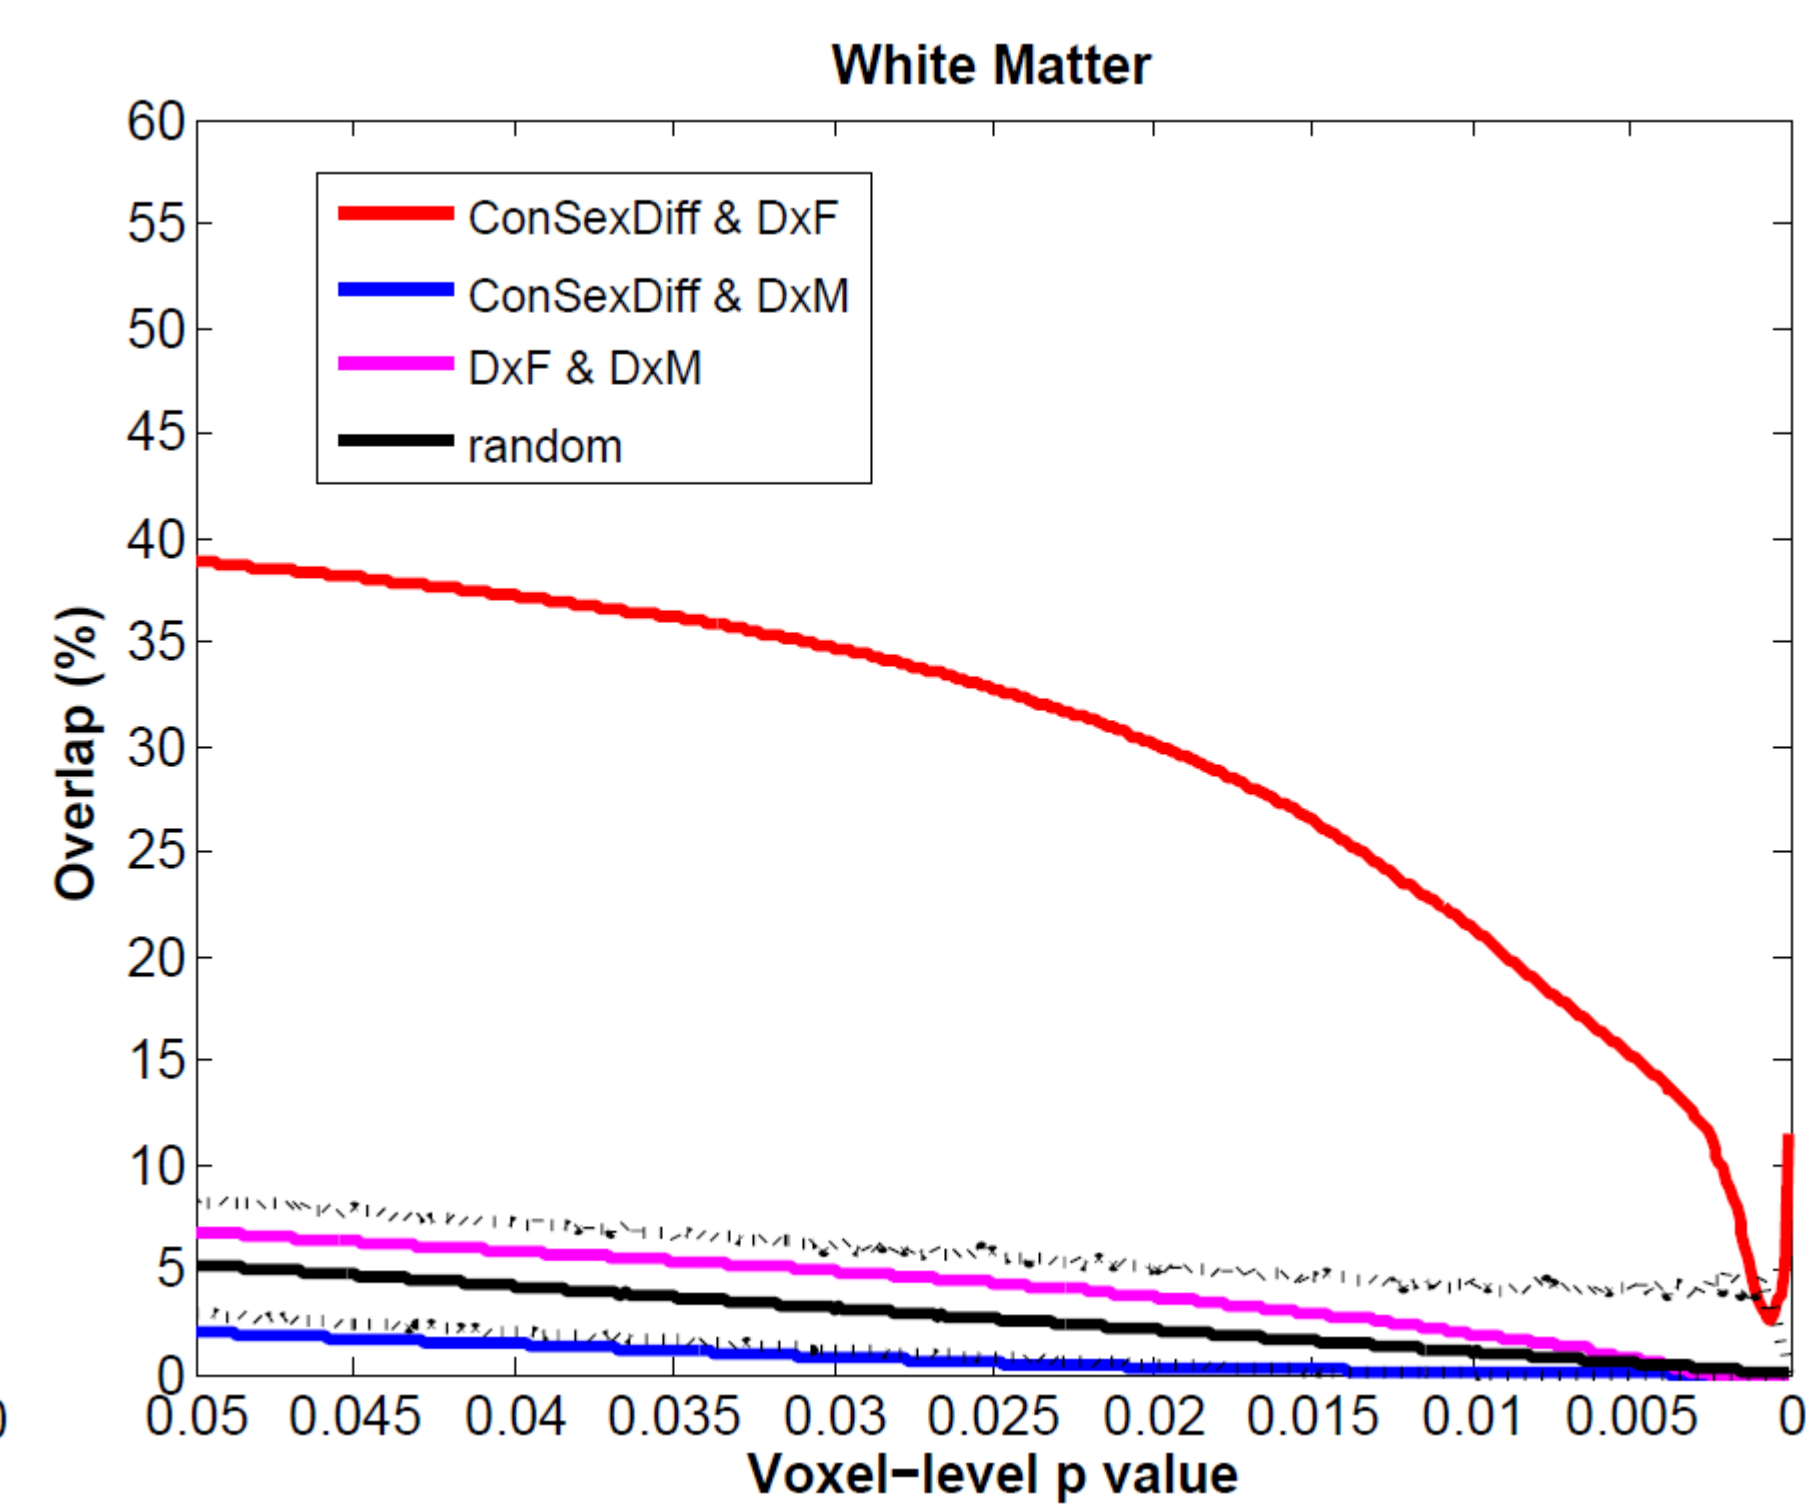

Supplement: supp_awt216_brain-2013-00261-File012.pdf [file supp_awt216_brain-2013-00261-File012.pdf]
