# Supplementary material for: Biological sex affects the neurobiology of autism
Source: PubMed Central journal article supplement (PMC3754459; doi:10.1093/brain/awt216), 2013-08-09

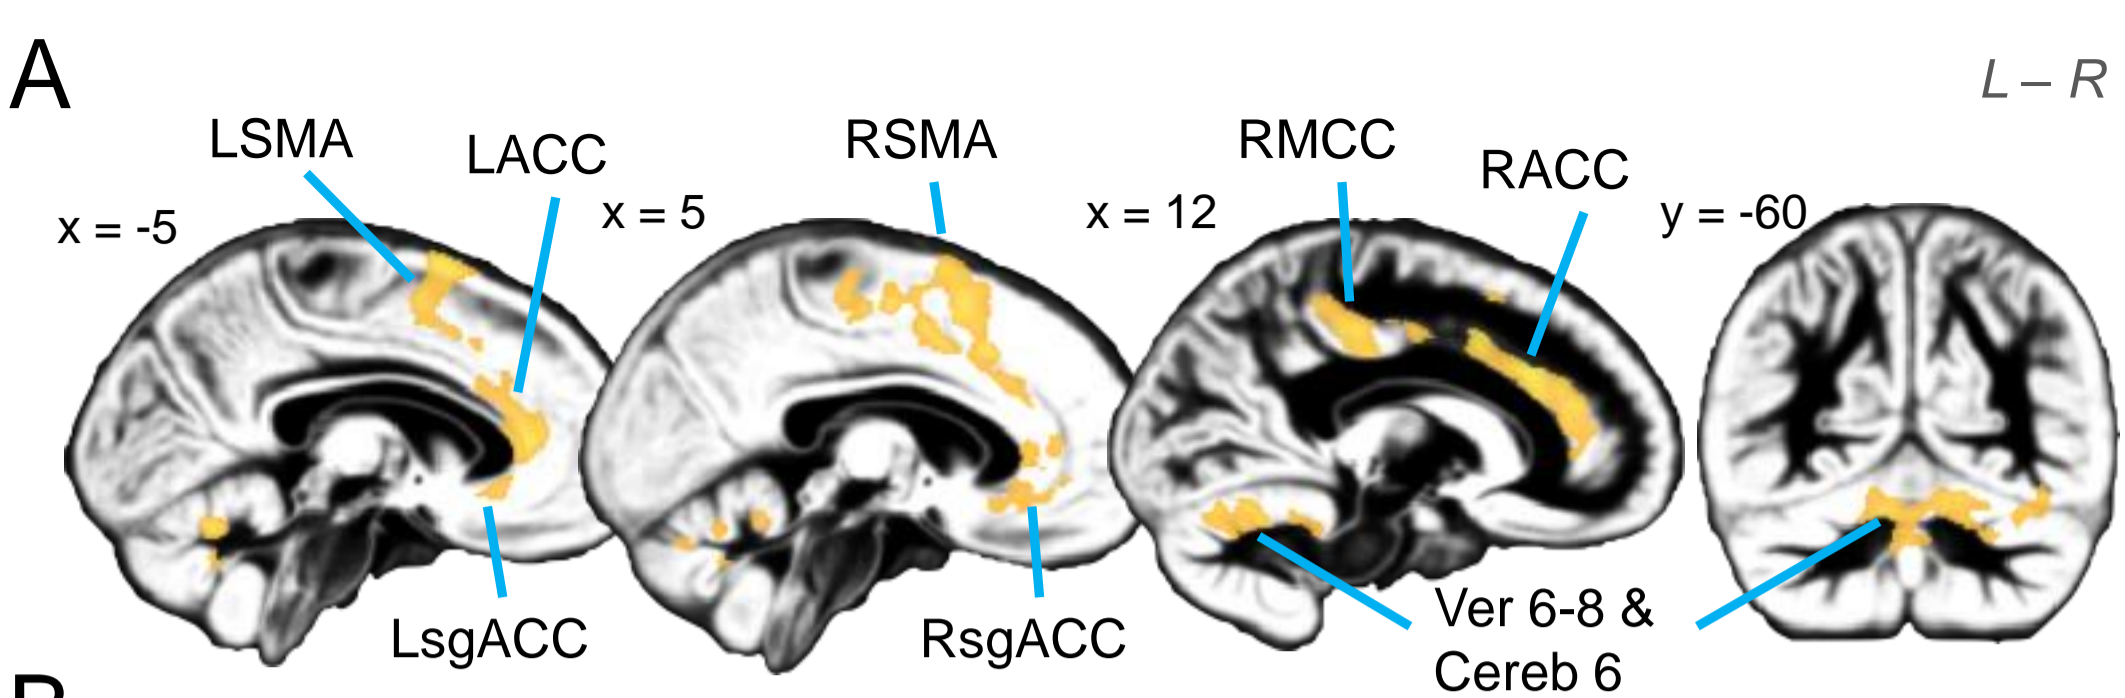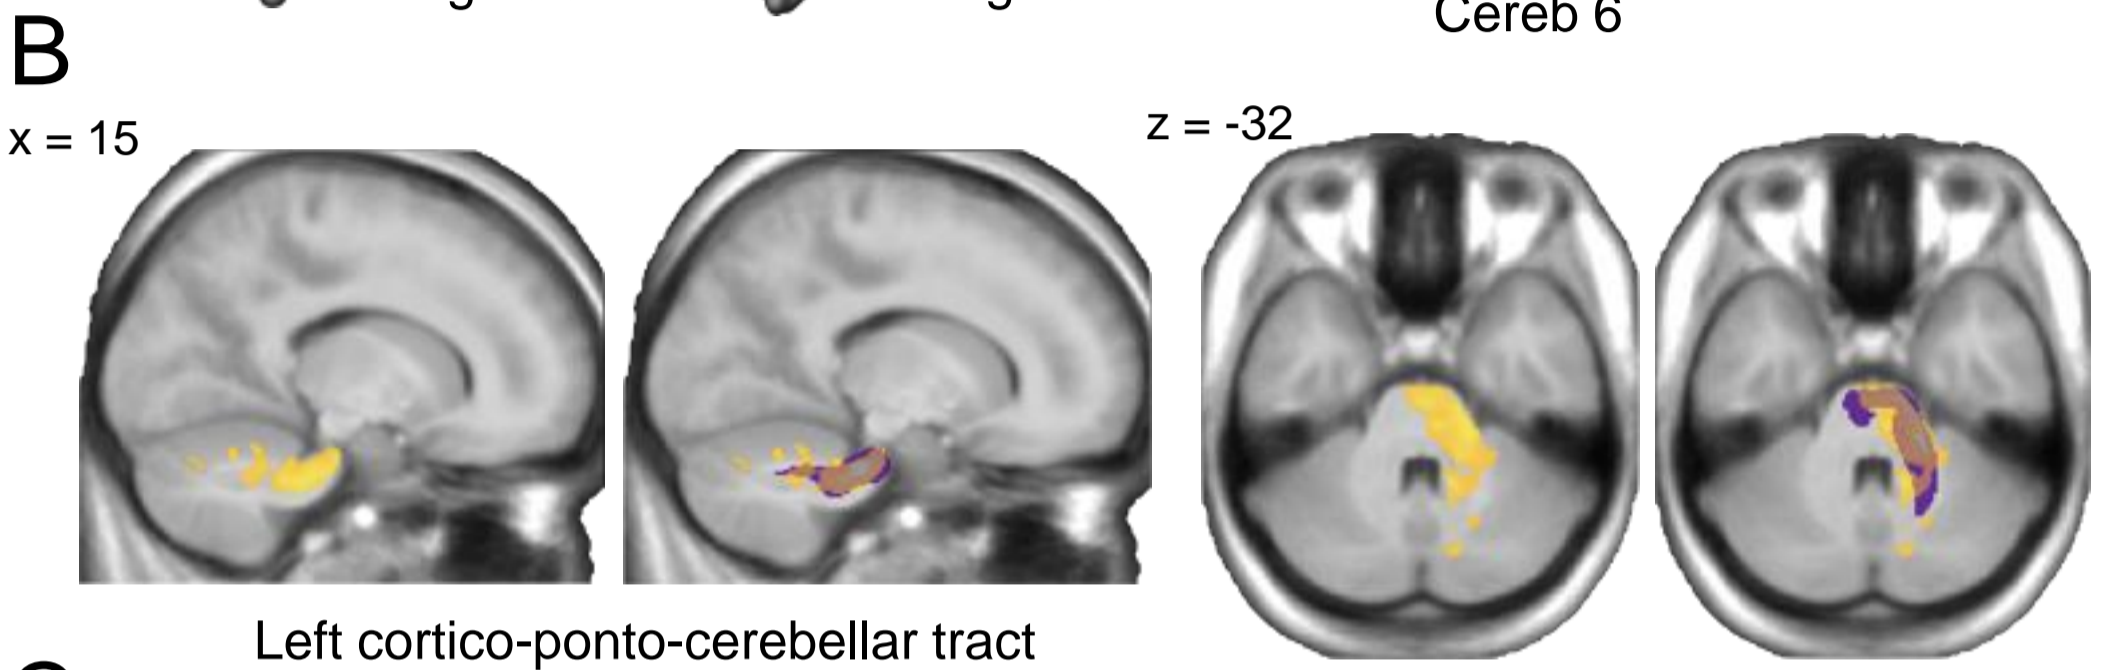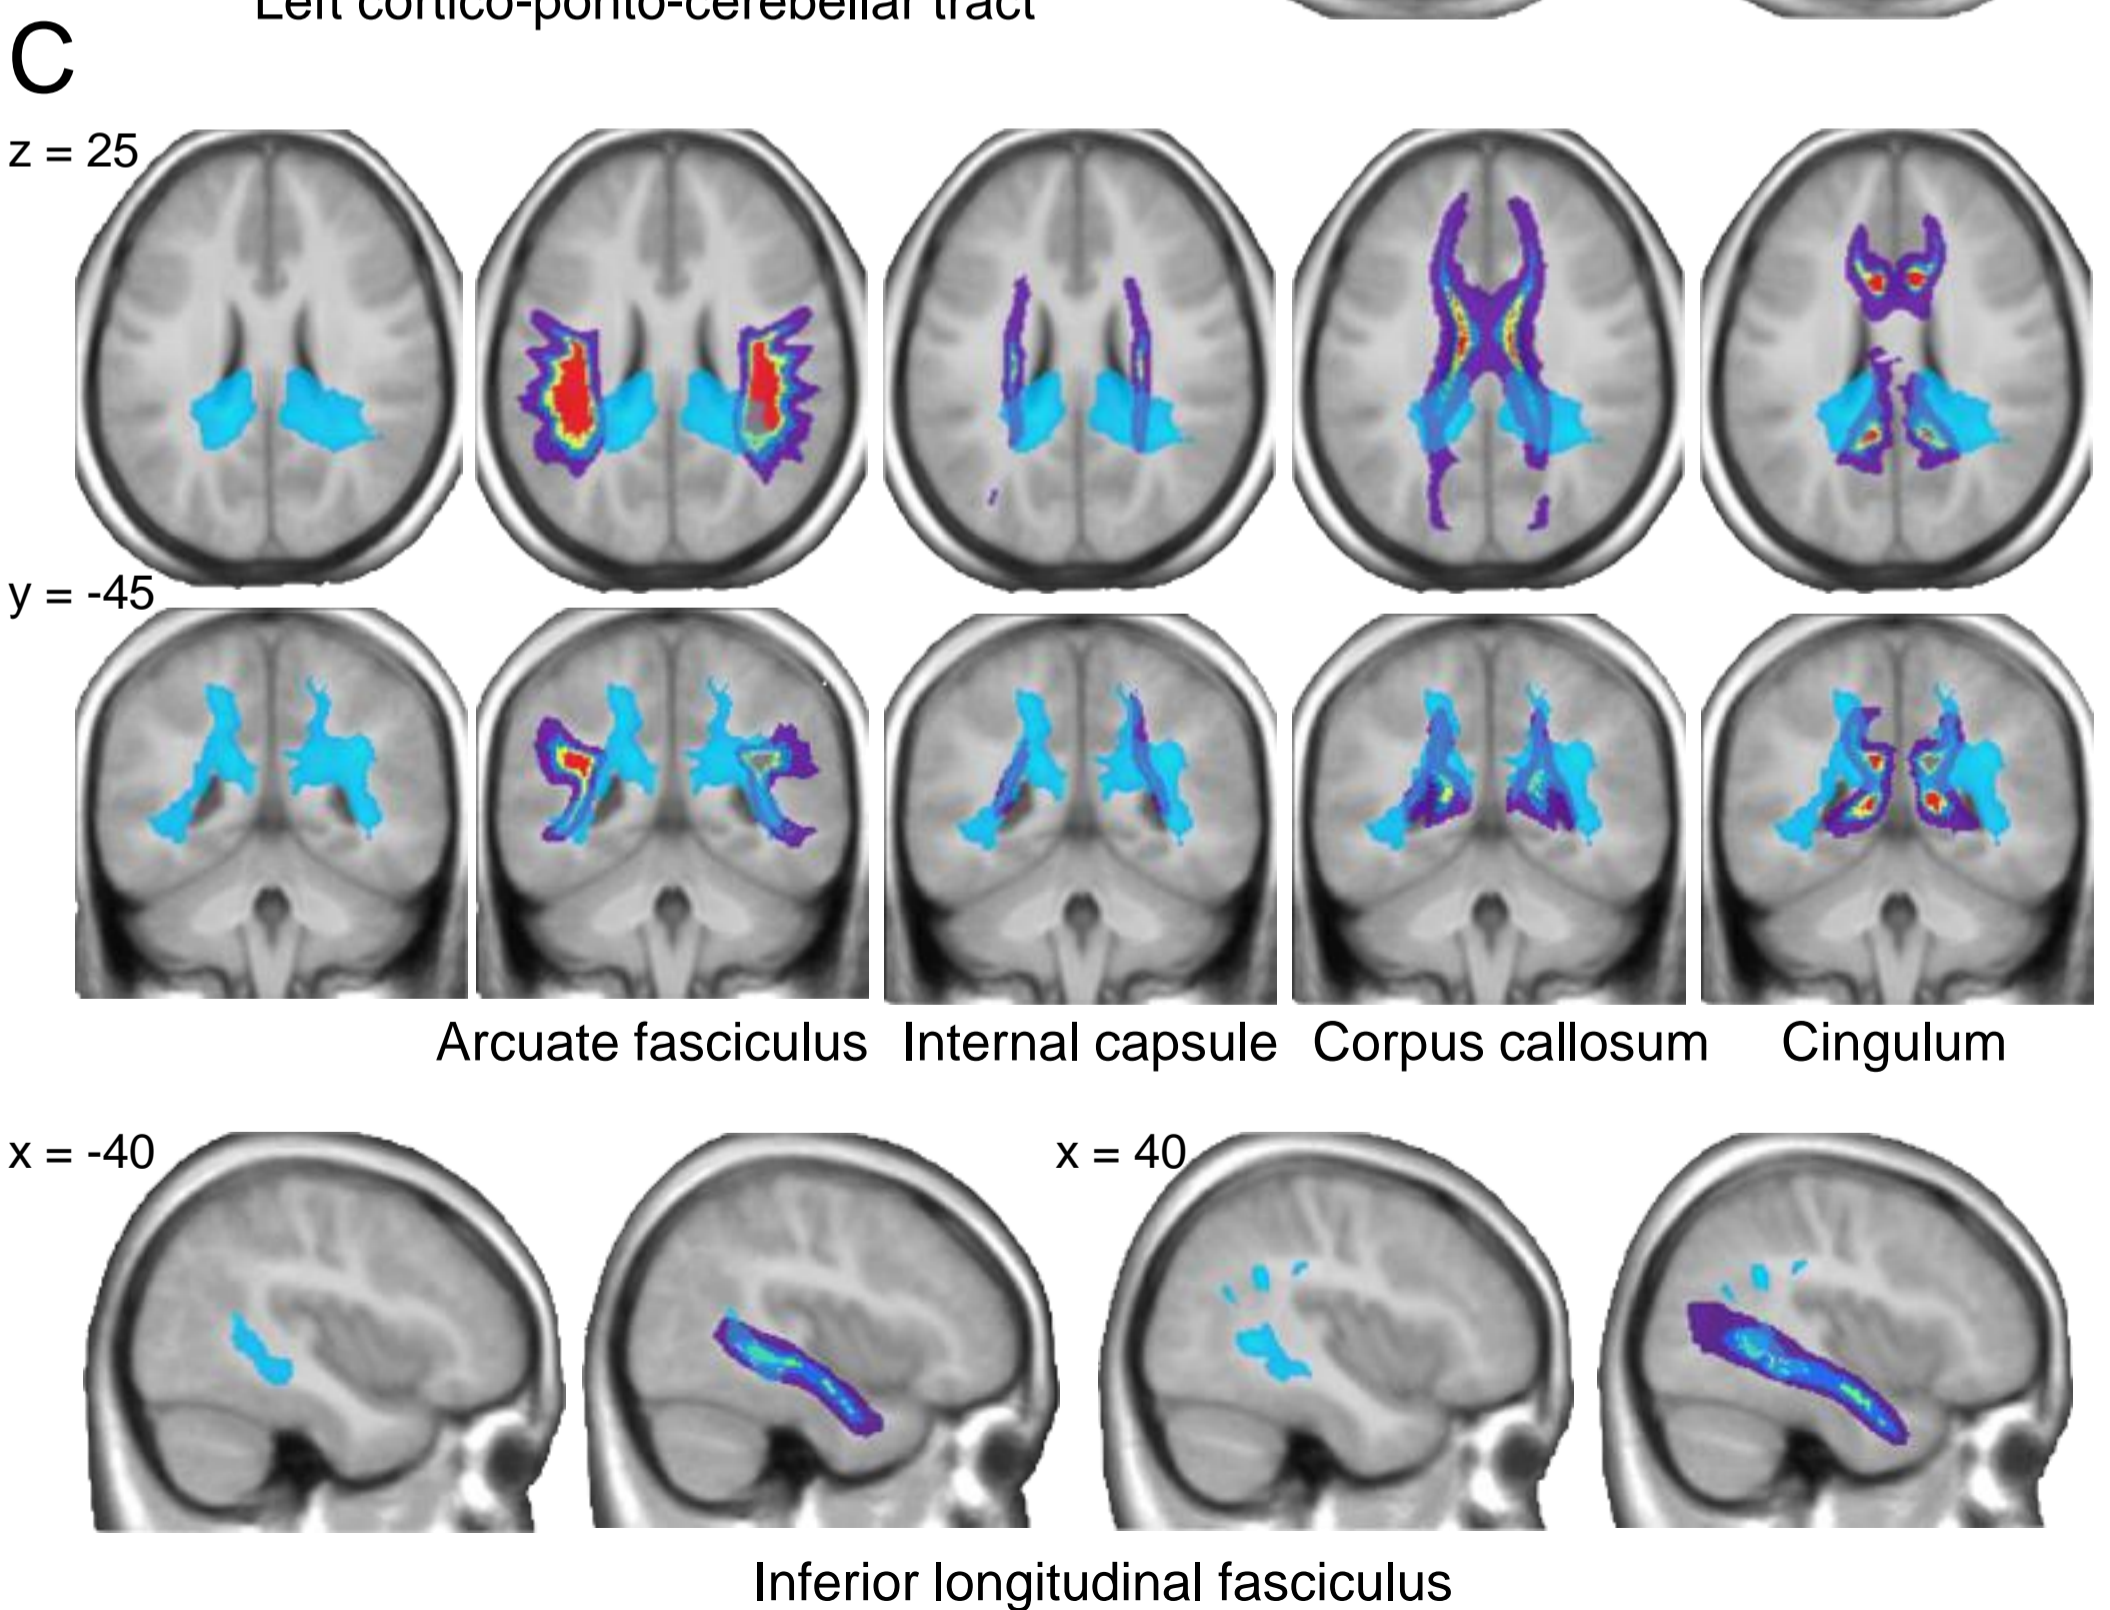

Supplement: supp_awt216_brain-2013-00261-File011.pdf [file supp_awt216_brain-2013-00261-File011.pdf]
